# Supplementary material
Source: PubMed Central journal article supplement (PMC2851896)
Supplement: 0911691107_pnas.0911691107_SI.pdf [file 0911691107_pnas.0911691107_SI.pdf]

# Supporting Information

Jensen et al. 10.1073/pnas.0911691107

## SI Text

**Materials and Methods. System preparation.** We embedded the pore domain (S4-S5 linker helix and helices S5 and S6; residues 312–421) of Kv1.2 [Protein Data Bank (PDB) entries 2A79 and 2R9R (1, 2)] into a palmitoyl oleoyl phosphatidyl ethanolamine (POPE) lipid bilayer solvated in 0.6 M KCl. All protein residues were modeled according to their titration state at neutral pH, leaving the protein with a net charge of  $-8e$ . The total number of atoms was approximately 70,000: 98  $K^+$  and 90  $Cl^-$  ions, about 10,000 water molecules, and 271 POPE molecules. The system measured roughly  $98 \times 98 \times 83 \text{ \AA}^3$ . We initially configured the occupancy of the pore with three  $K^+$  ions at selectivity filter (SF) sites S6, S3, and S1 and two water molecules at sites S2 and S4.

**Simulations.** Depolarizing and hyperpolarizing transmembrane potentials ( $-180 \text{ mV} < V < +180 \text{ mV}$ ) were imposed as constant electric fields,  $E$ , along the pore axis,  $z$ . To obtain the applied voltage,  $V$ , from  $E$ , we assumed that the entire potential drop occurs across the SF (3, 4); this implies  $V = E\Delta z$ , where  $\Delta z = 13.4 \pm 0.2 \text{ \AA}$  is the distance between Thr374:O<sub>γ</sub> and Tyr377:O, averaged over all simulations at depolarizing voltages. Thirty-one simulations were performed with an aggregate length of more than  $\sim 30 \text{ \mu s}$  (summarized in Table S1). All simulations were performed using Desmond (5) at constant pressure and temperature (NPT ensemble; 310 K, 1 bar) and Berendsen coupling scheme (6) with one temperature group. All bond lengths to hydrogen atoms were constrained using M-SHAKE (7). Van der Waals and short-range electrostatic interactions were cut off at 10  $\text{\AA}$ . Long-range electrostatic interactions were computed by the particle mesh Ewald (PME) method (8) using a  $64 \times 64 \times 64$  grid with  $\sigma = 2.35 \text{ \AA}$  and fifth-order B splines for interpolation. A time-reversible reference system propagator algorithm (RESPA) integrator (9) was used with a time step of 2 fs; long-range electrostatics were computed every 6 fs. In each simulation, the electric field was linearly increased to its final value over 9 ns, and initial harmonic positional restraints ( $24 \text{ kcal mol}^{-1} \text{ \AA}^{-2}$ ) on the protein were tapered off linearly over 27 ns.

**Analysis.** Coordinates were saved every 12 ps and were analyzed using HiMach (10); some analysis modules used Visual Molecular Dynamics (VMD) (11) for structure processing. Unless otherwise indicated, the initial 30 ns of all simulations were discarded as equilibration time.

Permeation through the Kv1.2 pore was recorded by tracking the positions of ions and water molecules as they passed through a region starting at Thr374:O<sub>γ</sub> on the intracellular side and ending at Tyr377:O on the extracellular side, with a 2  $\text{\AA}$  buffer included on both sides. Only ions and water molecules that fully permeated this region were considered as contributing to a permeation event; complete permeation events are summarized in Table S1, and only these events contributed to the calculated kinetic occupancy histograms (Fig. 2C and Fig. S2B). Ion and water molecule currents were determined from the inverse mean waiting time between two consecutive permeation events; errors in the individual currents were determined by blocking analysis (12), while propagation of these errors was used to estimate errors in the  $H_2O/K^+$  transport ratio (Fig. 1D).

We represented the three-ion configuration as a two-dimensional potential of mean force, using an in-house parallel implementation of the mixture-model fitting procedure described in Maragakis et al. (13) [see also Bowers et al. (14) and Bagenstoss

(15)], with the maximum likelihood out of 10,000 attempts (Fig. 2D, 15 Gaussians; Fig. S3, 16 Gaussians).

Potassium occupancy across the pore (Fig. 4A) was calculated by constructing histograms of the ion positions for ions below the intracellular-facing side of the SF (Thr374:O<sub>γ</sub>) and above the center of mass of Pro407 of the Pro405-Val406-Pro407 (PVP) constriction.

Water density across the pore (Fig. 4B) was calculated by building appropriately time-sliced histograms of water molecules found within a cylinder of 6  $\text{\AA}$  radius centered on the pore axis. Water occupancy in the cavity (Fig. 4F) was determined by counting the number of water molecules that resided below the intracellular-facing side of the SF (Thr374:O<sub>γ</sub>) and above the center of mass of Pro407 of the PVP constriction. A median filter of 12-ns width was applied to the resulting occupancies.

Electron density within the SF and cavity (Fig. S2) was calculated using a five Gaussian approximation (16) on a 0.2- $\text{\AA}$  grid ( $1 \text{ \AA}^2$  artificial temperature factor; Gaussians calculated within 3  $\text{\AA}$  of each atom position). Separate maps were calculated for  $K^+$  ions, water molecules, and all other atoms. For comparison with crystallographic data, the  $K^+$  and water maps were added to represent the observable X-ray density within the SF. Maps calculated from simulations under different biasing voltages were comparable to each other.

To allow for unbiased comparison of simulation and crystallographic maps, simulation maps were transformed to the same grid and coordinate frames used in the Kv1.2/Kv2.1 chimera (2) and KcsA (17) crystal structures. To account for Fourier series truncation and other experimental errors, only the experimentally observed structure factor indices were used, thereby replicating the observed data resolution limits and (in)completeness. To introduce experimental-like noise, the molecular dynamics (MD) structure factor amplitudes were randomly sampled from a Gaussian distribution (mean, original MD amplitude; SD, scaled crystallographic SD; negative randomized amplitudes reset to zero), and phases were randomly sampled from a phase-shifted (most-probable phase equal to original MD phase) unimodal phase distribution calculated using the crystallographic Hendrickson–Lattman coefficients. Centric reflection phases were shifted, after randomization, to the nearest of  $0^\circ$  or  $180^\circ$ . Overall, this procedure gave maps that were essentially indistinguishable from the original maps without added noise.

**Kv1.2/2.1 chimera.** A control simulation of the intact Kv1.2/Kv2.1 chimeric protein (2), comprising voltage sensing, pore, and T1 domains embedded into a POPE bilayer and solvated in 0.6 M KCl, was performed at 0 mV for  $\sim 1.7 \text{ \mu s}$ . The total number of atoms was approximately 317,000: 816  $K^+$  and 820  $Cl^-$  ions, about 77,000 water molecules, and 471 POPE molecules. The lipid-embedded chimeric channel measured initially roughly  $150 \times 150 \times 150 \text{ \AA}^3$ ; thus, we used a  $128 \times 128 \times 128 \text{ \AA}^3$  grid and  $\sigma = 2.23 \text{ \AA}$  in the PME electrostatics calculation. Pressure (1 bar) and temperature (310 K) were kept constant using the Martyna–Tobias–Klein method (18). All other aspects of the simulation protocol, in particular, the initial configuration of  $K^+$  ions and  $H_2O$  molecules in the SF, were performed as in the pore-only simulations.

**Visualization.** Molecular images in the main text were rendered using PyMol (19). Molecular images were rendered using PyMol, POV-Ray (<http://www.povray.org>), and VMD (11).



**Table S1. Summary of simulations**

| Voltage, mV          | Time, ns          | Final conformation | Permeation events |                  |
|----------------------|-------------------|--------------------|-------------------|------------------|
|                      |                   |                    | K <sup>+</sup>    | H <sub>2</sub> O |
| <i>2A79</i>          |                   |                    |                   |                  |
| +145                 | 634.968           | Open               | 45                | 49               |
| +145                 | 500.064           | Open               | 63                | 52               |
| +134                 | 436.668           | Inactivated        | 3                 | 2                |
| +134                 | 612.672           | Open               | 29                | 29               |
| +123                 | 884.388           | Open               | 93                | 80               |
| +116                 | 164.276           | Inactivated        | 2                 | 2                |
| +114                 | 561.960           | Inactivated        | 23                | 19               |
| +112                 | 1,015.308         | Inactivated        | 22                | 18               |
| +112                 | 623.028           | Open               | 18                | 18               |
| +102                 | 1,005.912         | Open               | 40                | 38               |
| +87                  | 1,057.22          | Closed             | 0                 | 0                |
| +87                  | 1,090.824         | Inactivated        | 16                | 14               |
| +72                  | 1,011.384         | Open               | 8                 | 9                |
| +51                  | 1,114.5844        | Inactivated        | 2                 | 4                |
| <b>Total</b>         | <b>10,713.260</b> |                    | <b>364</b>        | <b>334</b>       |
| <i>Model</i>         |                   |                    |                   |                  |
| 0                    | 1,176.158         | Closed (symmetric) | 0                 | 0                |
| +87                  | 412.788           | Closed (symmetric) | 0                 | 0                |
| <b>Total</b>         | <b>1,588.946</b>  |                    | <b>0</b>          | <b>0</b>         |
| <i>2R9R</i>          |                   |                    |                   |                  |
| +178                 | 276.299           | Open               | 19                | 20               |
| +156                 | 408.924           | Open               | 28                | 26               |
| +134                 | 534.406           | Open               | 37                | 32               |
| +123                 | 752.424           | Inactivated        | 25                | 21               |
| +112                 | 605.724           | Open               | 38                | 38               |
| +101                 | 1,246.632         | Open               | 28                | 21               |
| +87                  | 801.048           | Open               | 15                | 15               |
| +51                  | 1,568.400         | Inactivated        | 0                 | 0                |
| +26                  | 2,085.144         | Open               | 0                 | 0                |
| 0                    | 2,098.800         | Closed             | 0                 | 0                |
| <b>Subtotal</b>      | <b>10,377.801</b> |                    | <b>190</b>        | <b>173</b>       |
| -26                  | 2,000.400         | Open               | 0                 | 0                |
| -51                  | 2,000.400         | Closed             | 1                 | 0                |
| -87                  | 2,000.400         | Closed             | 7                 | 7                |
| -123                 | 2,000.400         | Closed             | 9                 | 10               |
| -178                 | 2,000.400         | Closed             | 7                 | 3                |
| <b>Subtotal</b>      | <b>10,002.000</b> |                    | <b>24</b>         | <b>20</b>        |
| <b>Total</b>         | <b>20,379.801</b> |                    | <b>214</b>        | <b>193</b>       |
| <i>Intact 2R9R</i>   |                   |                    |                   |                  |
| 0                    | 1,683.600         | Open               | 0                 | 0                |
| <b>Overall total</b> | <b>34,365.607</b> |                    | <b>578</b>        | <b>527</b>       |

Applied voltage, simulation time, final conformation of the pore domain, and number of permeation events for K<sup>+</sup> ions and water molecules are listed for each simulation. Table is organized to reflect the fact that initial structures were based on PDB entries 2A79 (1) and 2R9R (2). Simulation time and permeation events are totaled for each initial structure and for all simulations combined. In eight simulations at depolarizing voltages (+51 to +134 mV), the channel underwent a conformational transition into an inactivated state that irreversibly attenuated the ionic current on the microsecond scale (Fig. S1). In most of these simulations, the pore domain steadily transported ions before current attenuation; permeation was analyzed up to that point. Occasionally, in simulations at large depolarizing voltages ( $\geq +123$  mV), water molecules entered the outside of the selectivity filter, causing its distortion toward the end of the simulations (approximately the final 10% of simulation time given above). Permeation events were counted only up to that point. From the final closed (partially dewetted) conformation obtained at +87 mV (2A79), we constructed a 4-fold symmetric model ("Model") of the closed pore. During simulation (0 mV) this model remained closed but its subunits relaxed into an approximate two-by-two packing closely resembling the predominant pore conformation that resulted from simulations at hyperpolarizing, pore-closing voltages (Fig. 4). Subjecting the two-by-two packed conformation to a depolarizing voltage (+87 mV) did not result in pore opening over  $\sim 400$  ns.









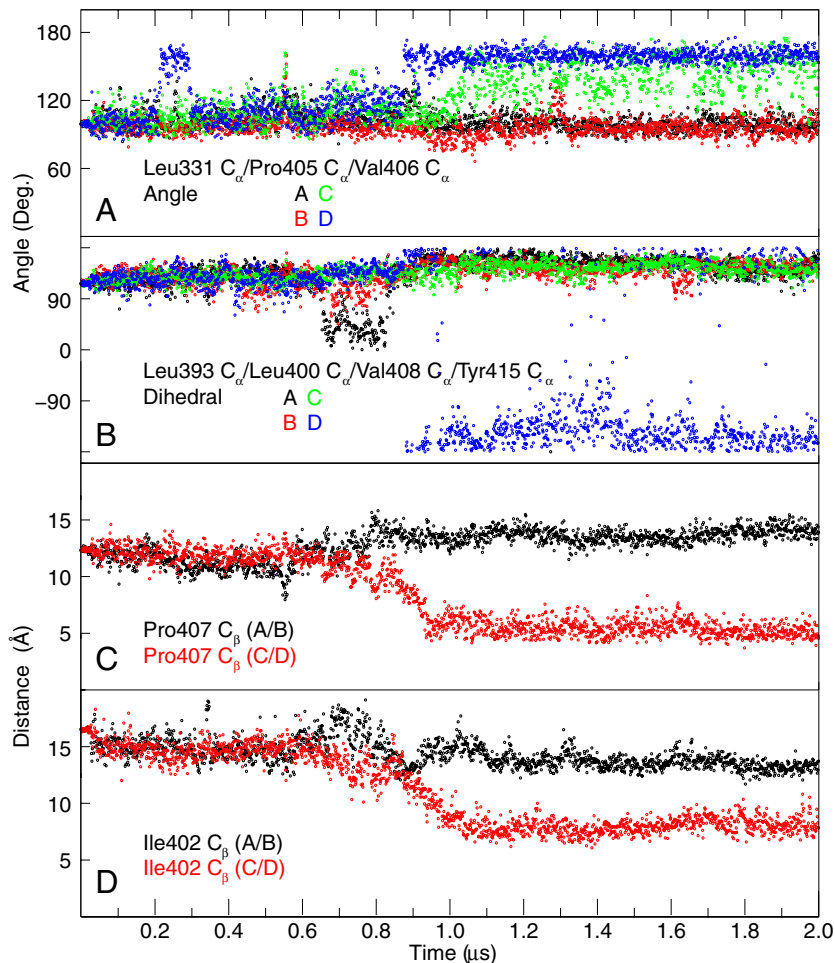

**Fig. S7.** Structural changes during pore closure. Structural changes observed during complete pore closure at a representative hyperpolarizing voltage ( $-123$  mV). (A) Leu331/Pro405 side chain interchange: the angles between the Leu331  $C_{\alpha}$ /Pro405  $C_{\alpha}$ /Val406  $C_{\alpha}$  atoms of each subunit are shown. Note the interchange in subunit D (Blue) at about  $0.9 \mu\text{s}$ . (B) Helix S6 straightening: the Leu393  $C_{\alpha}$ /Leu400  $C_{\alpha}$ /Val408  $C_{\alpha}$ /Tyr415  $C_{\alpha}$  dihedral angles are shown. S6 straightens in subunit D at about  $0.9 \mu\text{s}$ . (C) Lower pore cavity constriction; the Pro407  $C_{\alpha}$ /Pro407  $C_{\alpha}$  distances, between subunits A and B (Black) and C and D (Red) across the Kv1.2 tetrameric pore domain diagonal, are shown. Note the gradual closure of subunits C and D beginning at about  $0.7 \mu\text{s}$ . (D) Upper pore cavity constriction; the diagonal Ile402  $C_{\alpha}$ /Ile402  $C_{\alpha}$  distances are shown.

[Fig. S8 \(PDF\)](#)

**Fig. S8.** Pore cavity of diverse ion channels is hydrophobic. Primary sequences of several ion channels of diverse structure are aligned. Sequence alignments begin at the selectivity filter and continue through the approximate end of helix S6. Alignments follow the three-dimensional alignments as defined by available crystal structures. In the alignments, hydrophobic residues are colored black; positive Arg and Lys residues are blue; potentially positive His residues are light blue; negative Asp and Glu residues are red; neutral, polar residues Asn, Gln, Ser, and Thr are green; and Pro residues are brown. Helix S6 may actually begin more N-terminal in the sequence than indicated for some channels of unknown structure (e.g., the  $\text{Na}^+$  or  $\text{Ca}^{2+}$  channels), but the end of S6 is more definite (note the transition from hydrophobic to hydrophilic character). The table is arranged in the following order: ionotropic glutamate receptors;  $\text{K}^+$  channels;  $\text{Na}^+$  channels;  $\text{Ca}^{2+}$  channels; and transient receptor potential (TRP) channels. The "Residues" column contains links to the Uniprot sequence, with those particular residues highlighted; the "Uniprot" column contains links to the full Uniprot entry for that channel; and the "PDB" column contains links to a (representative) crystal structure for those channels for which a structure has been determined. Note the extreme conservation of hydrophobic character within the pore cavity, which is highlighted in light yellow. The exceptions to this rule are informative, e.g., the substitution of hydrophobic Ile402 in Kv1.2, which is located at the N terminus (adjacent to the selectivity filter) of the pore cavity, by charged Asp or polar Asn residues in the inwardly rectifying mammalian Kir channels.



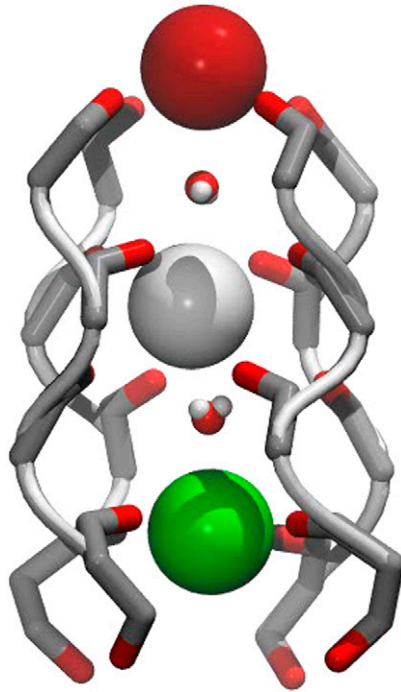

**Movie S1.** Permeation.  $K^+$  ion (*Large Spheres*) and water molecule (*Red and White*) permeation across the selectivity filter ( $-123$  mV). Kv1.2 residues 374–378 (backbone) and part of the side chain of Thr374 are shown.

[Movie S1 \(MPG\)](#)

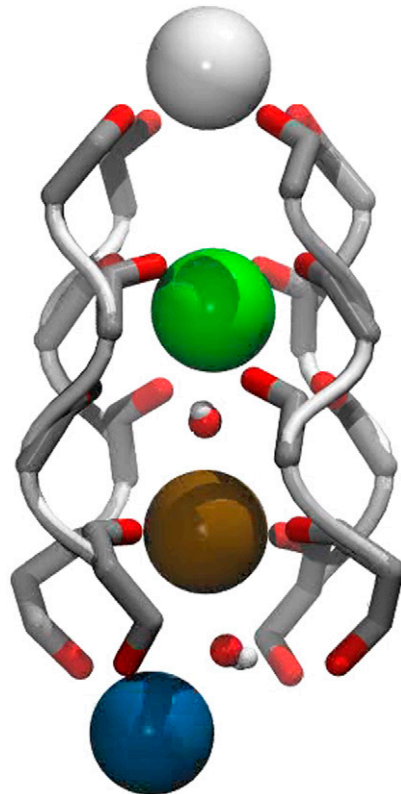

**Movie S2.** Knock-on mechanism. Excerpt of Supporting Movie S1 at finer frame rate enhancing the detailed motions of  $K^+$  ions and water molecules; a sequence of five consecutive knock-on events by  $K^+$  entering SF site S5 is shown. See also Movie S1 caption.

[Movie S2 \(MPG\)](#)

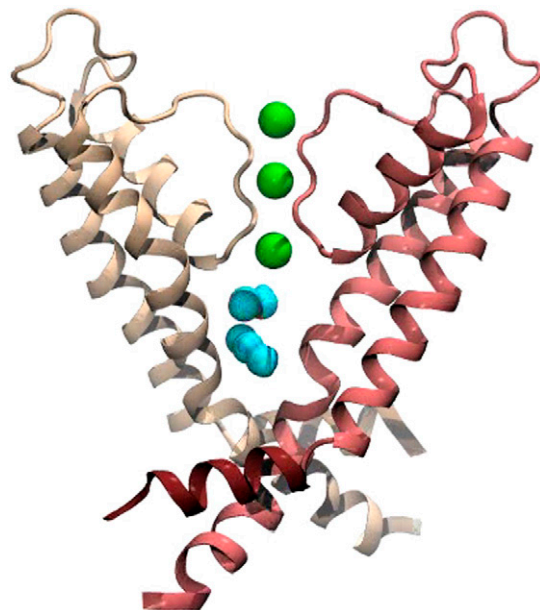

**Movie S3.** Pore closure: dewetting. Depletion of water molecules (*Blue*) from the pore cavity ( $-178$  mV). Two Kv1.2 subunits are shown, colored as in Fig. 4 (S4-S5 linker helix in darker tones). K<sup>+</sup> ions (*Green Spheres*) within the selectivity filter are also shown.

[Movie S3 \(MPG\)](#)

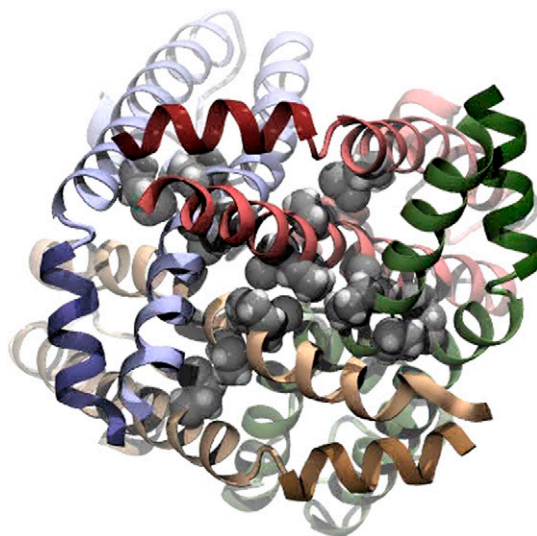

**Movie 4.** Pore closure: constriction formation. Pore closure viewed from the intracellular side ( $-178$  mV). The four subunits are colored as in Fig. 4, and residues Leu331 and Pro405, Val406, and Pro 407 (PVP constriction) are shown as van der Waals spheres.

[Movie S4 \(MPG\)](#)

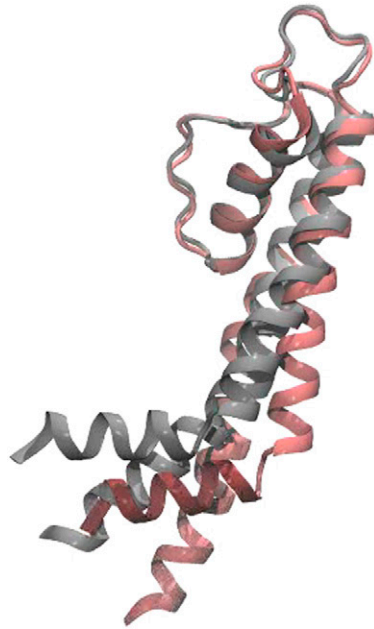

**Movie 5.** Pore closure: protein conformational changes. Straightening of helix S6 and movement of the S4–S5 linker helix (*Pink*) toward the intracellular side (–178 mV). The X-ray structure (static) is shown in gray. One Kv1.2 subunit is shown.

[Movie S5 \(MPG\)](#)

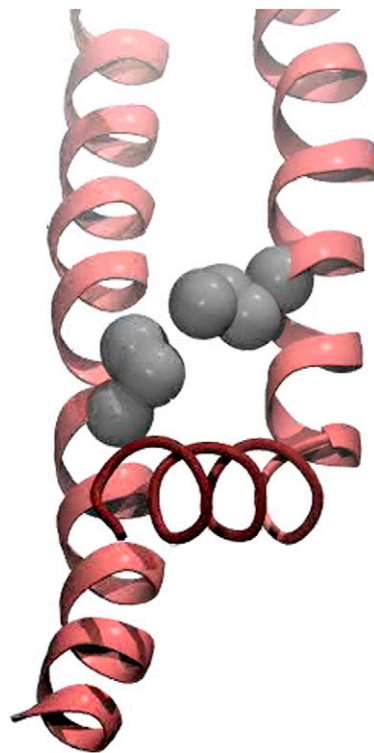

**Movie 6.** Pore closure: Pro405–Leu331 side chain interchange. Interchange of the side chains of Pro405 (helix S6, *Left*) and Leu 331 (helix S5, *Right*) locks S6 into a straightened conformation (–178 mV). One Kv1.2 subunit is shown.

[Movie S6 \(MPG\)](#)
