# Supplementary material
Source: PubMed Central journal article supplement (PMC2851896)
Supplement: 0911691107_SF8.pdf [file 0911691107_SF8.pdf]

# Ion Channel SF/S6 Alignments

| Protein           | Sequence                                                               |        |                                    |            |           | Residues | Uniprot                       | Organism | PDB |
|-------------------|------------------------------------------------------------------------|--------|------------------------------------|------------|-----------|----------|-------------------------------|----------|-----|
|                   | Selectivity Filter                                                     | Linker | S6 Start                           | S6 Cavity  | S6 End    |          |                               |          |     |
| GluR0             | TTVGYGDRSPR                                                            |        | TKLGQVLVAGVVMVLVALLSFSSTITAGLAS    | AFST       | 207-249   | P73797   | <i>Synechocystis</i> PCC 6803 |          |     |
| GluR-2/AMPA-2     | FMQQGCDISPR                                                            |        | SLSGRIVGGVWVFFLLIISSYITANLAA       | FLTV       | 605-647   | P42262   | Human                         |          |     |
| GluR-5/kainate-1  | LMQQGSLEMPK                                                            |        | ALSTRIVGGIWWFFLLIISSYITANLAA       | FLTV       | 634-676   | P39086   | Human                         |          |     |
| GluR/NMDA-2A      | VFNSVFPVQNPK                                                           |        | GTTSKIMVSVWVAFVAVIFLASYTANLAA      | FMIQ       | 612-655   | Q547U9   | Human                         |          |     |
| KcsA              | TTVGYGDLVFPV                                                           |        | TLWGRLVAVVVMVAGITSFGLVTAALAT       | WFGV       | 74-116    | POA334   | <i>S. lividans</i>            | 1K4C     |     |
| MthK              | ATVGYGDYSPS                                                            |        | TPLGMYFTVLIVLIGIGTFAVAVERLLE       | FLIN       | 58-100    | O27564   | <i>M. thermoautotrophicum</i> | 1LNQ     |     |
| MlotiK1           | STTGYGDTTPQ                                                            |        | SFAGRVLAGAVMMSGIGIFLWAGILAT        | GFYQ       | 174-216   | Q98GN8   | <i>M. loti</i>                | 3BEH     |     |
| HCN1              | LCIGYGAQAPVSM                                                          |        | SDLWITMLSMIVGATCYAMFVGHATALIQSLDS  |            | 346-391   | O88704   | Mouse                         |          |     |
| HCN4              | LCIGYGRQAPVGM                                                          |        | SDVWLITMLSMIVGATCYAMFVGHATALIQSLDS |            | 477-522   | Q9Y3Q4   | Human                         |          |     |
| CNGA1             | TTIGETPPFVRD                                                           |        | SEYFVVVDFLIGVLIFATIVGNIGSMISNMNA   |            | 361-405   | P29973   | Human                         |          |     |
| Kv1.1 (H-ERG)     | TSVGFNVSPNTN                                                           |        | SEKIFSIIVMLIGSLMYASIFGNVSAIQRLYS   |            | 623-668   | Q12809   | Human                         |          |     |
| Slo1 (slowpoke)   | STVGYGDDVYAK                                                           |        | TTLGRLFMVFIFLGLGLAMFASVPEIIE       | LIGN       | 351-393   | Q12791   | Human                         |          |     |
| SK1               | LSIGYGDVMPH                                                            |        | TYCGKGVCLLTGIMGAGTALVVAVVAR        | KLEL       | 329-371   | Q92952   | Human                         |          |     |
| KvAP              | TTVGYGDVYVPA                                                           |        | TPIGKVIQIAVMTGTISALTLLIGTVSN       | MFQK       | 208-250   | Q9YDF8   | <i>A. permix</i>              | 1ORQ     |     |
| Shaker            | TTVGYGDMTPV                                                            |        | GVWGKIVGSLCVVAVGLTIALPVPVIVS       | NFNY       | 441-483   | P08510   | <i>D. melanogaster</i>        |          |     |
| SqKv1A            | TTVGYGDMSPV                                                            |        | GVYKLVGSLCAIAGVLTIALPVPVIVS        | NFNY       | 367-409   | Q25376   | <i>L. opalescens</i>          |          |     |
| Kv1.2             | TTVGYGDMVPT                                                            |        | TIGGKIVGSLCAIAGVLTIALPVPVIVS       | NFNY       | 373-415   | P63142   | Rat                           | 2R9R     |     |
| Kv1.2             | TTVGYGDMVPT                                                            |        | TIGGKIVGSLCAIAGVLTIALPVPVIVS       | NFNY       | 373-415   | P16389   | Human                         |          |     |
| Kv1.5             | TTVGYGDMRPI                                                            |        | TVGKIVGSLCAIAGVLTIALPVPVIVS        | NFNY       | 479-521   | P22460   | Human                         |          |     |
| Kv3.1             | TTLGYGDVMPQ                                                            |        | TWVGLVGLCALCAGVLTIAMVPEVIVN        | NFGM       | 399-441   | P48547   | Human                         |          |     |
| Kv5.1             | TTVGYGDVYPK                                                            |        | TTLGLKNAATISFLCGVIAIALPHPIIN       | NFVR       | 369-411   | Q9H3M0   | Human                         |          |     |
| Kv7.1 (KvLQT1)    | TTIGYGDVYVQ                                                            |        | TWVQKTIASCFVSFAISFFALPAGILGS       | GFAL       | 311-353   | P51787   | Human                         |          |     |
| Kir1.1 (ROM-K)    | VTIGYGFRCVTEQ                                                          |        | CATAIFLLIQSILGVIINFSMCGAILA        | KISR       | 140-184   | P48048   | Human                         |          |     |
| Kir3.1 (GIRK1)    | ATIGYGYRIITDK                                                          |        | CPBGIIILFLQISIVLDFLIGCMFI          | KMSQ       | 142-186   | P48549   | Human                         |          |     |
| Kir6.2 (K-ATP)    | VTIGFGRMVTBE                                                           |        | CPLAILLIVQINIVGLMNAIMLGCIFM        | KTAQ       | 129-173   | Q14654   | Human                         |          |     |
| KirBac1.1         | ATVGYGDMHPQ                                                            |        | TVYAHAIATLEIFVGMGIALSTGLVFA        | RFAR       | 109-151   | P83698   | <i>B. pseudomallei</i>        | 1P7B     |     |
| KirBac1.4         | ATVGYGDMHPQ                                                            |        | TVYAHAIATLEIFVGMGIALSTGLVFA        | RFAR       | 109-151   | Q5PMX2   | <i>B. thailandensis</i>       |          |     |
| KirBac3.1         | ATIGYKLIPI                                                             |        | GPLANTQVTEALCGMLGLVAASLIYA         | RFTR       | 120-162   | Q2PW6R1  | <i>M. magnetiscus</i>         | 1XL4     |     |
| KirBac1.3         | ATVGYGDMHPQ                                                            |        | TVYAHAIATLEIFVGMGIALSTGLVFA        |            | 108-141   | Q146M9   | <i>B. xenovornas</i>          | 2QKS     |     |
| Kir3.1            |                                                                        |        |                                    | GCMFI-KMSQ | 178-186   | P63250   | Mouse                         |          |     |
| ORK1 (KCNK0)      | STVGYGNI SPT                                                           |        | TFAGRIMIMAIYSVIGIPVNGILFAGLGE      | YFGR       | 104-146   |          | <i>D. melanogaster</i>        |          |     |
|                   | TTIGFPGDYYVTPFGANQP                                                    |        | KEFGGWFVVQIQIVIVWFIFSLGYLVM        | MTFI       | 216-264   | Q94526   |                               |          |     |
| Twik-1            | STTGYGHVTP                                                             |        | SDGGKAFCIISVIGIPFLLFLTAVVQ         | RITV       | 116-158   |          | Human                         |          |     |
|                   | STIGLGDVYVPEGYNQKF                                                     |        | RELYKIGITCYLLGLLAVLVLETFCE         | LHEL       | 224-273   | O00180   |                               |          |     |
| Trek-1            | TTIGFGNISPR                                                            |        | TEGGKIFCIIYALLGIPFLFGLLAGVGD       | QLGT       | 156-198   | Q95069   | Human                         |          |     |
|                   | TTIGFPGDYYVAGGSDIEY                                                    |        | LDYKPVVWFVILVGLYFAAVLSMIGD         | WLRV       | 265-313   |          |                               |          |     |
| NaK               | TTVGDGNFSPQ                                                            |        | TDFGKIFTILYIFIGLGVFGFIHKLAVNVQLP   |            | 62-105    | Q81HW2   | <i>B. cereus</i>              | 3E86     |     |
| Nav               | TQDYVENLYQLVIRAE                                                       |        | GPVHALFFILVIFLGSFYLVNLLIATVAMS     | YDE        | 358-406   |          |                               |          |     |
|                   | CGEWLESMWTCMEVA                                                        |        | GYACVFFLLTMIIGNLVNLLFLALLLSSFGA    |            | 771-818   |          |                               |          |     |
|                   | TFKGWINIMSDATDIRDIDQDPKIKEN                                            |        | SILMYLVFLVIFIGSFFTLNLFIVGVIDNFNQ   |            | 1232-1290 | Q25377   | <i>L. opalescens</i>          |          |     |
|                   | TSAGWDGLVLAAIMREPPACQPDLPKIFGSKSNNGNCGN                                |        | YGMAMVFLVITLVISFLVNMNYIAVILENFSQ   |            | 1525-1594 |          |                               |          |     |
|                   | TQDFWENLYQLTLRAA                                                       |        | GKTYMIFVFLVIFLGSFYLVNLLIATVAMS     | YEE        | 380-428   |          |                               |          |     |
|                   | CGEWLETWDCMEVAG                                                        |        | QAMCLTVFMVMVIGNLVNLLFLALLLSSFS     |            | 949-997   |          |                               |          |     |
| Nav1.1            | TFKGMDDIMYAAVDSRNVLQPKYEE                                              |        | SLYMYFVFIIFIGSFFTLNLFIVGVIDNFNQ    |            | 1430-1488 | P35498   | Human                         |          |     |
|                   | TSAGWDGLLAPILNLSKPPDCDPKKNVPGSSVKGDCGN                                 |        | PSVGIFFFVSYIIISFLVNMNYIAVILENFSV   |            | 1722-1791 |          |                               |          |     |
|                   | TQDYVENLYQQLTLRAA                                                      |        | GKTYMIFVFLVIFLGSFYLVNLLIATVAMS     | YEE        | 359-407   |          |                               |          |     |
|                   | CGEWLETWDCMEVAG                                                        |        | QAMCLVFMVMVIGNLVNLLFLALLLSSFS      |            | 925-973   |          |                               |          |     |
| Nav1.7            | TFKGWIIIMYAAVDSVNDKQPKYEE                                              |        | SLYMYFVFIIFIGSFFTLNLFIVGVIDNFNQ    |            | 1404-1462 | Q15858   | Human                         |          |     |
|                   | TSAGWDGLLAPILNLSKPPDCPKVHPGSSVEGDCGN                                   |        | PSVGIFVFSYIIISFLVNMNYIAVILENFSV    |            | 1696-1765 |          |                               |          |     |
|                   | TQDSWEKLYQQLTRIT                                                       |        | GLYSVFFIVIFLGSFYLVNLLIATVAMS       | YEE        | 357-405   |          |                               |          |     |
|                   | CGEWIENMWECEQANAS                                                      |        | SSLCVIVFILTIVIGKLVNLLFLALLLNSFSN   |            | 766-816   | Q9UI33   | Human                         |          |     |
| Nav1.9            | TFKGMDDIMYAAVDSSTEKEQQPEFES                                            |        | NSLGYIFVFIIFIGSFFTLNLFIVGVIDNFNQ   |            | 1255-1313 |          |                               |          |     |
|                   | TSAGWDGLLAPILNLSKPPDCPKVHPGSSVEGDCGN                                   |        | PSVGIFVFSYIIISFLVNMNYIAVILENFSV    |            | 1549-1618 |          |                               |          |     |
| NaChBac           | TLESWASGVMPPIFAE                                                       |        | VPWSWLYFVSVFLIGTIFIFNLFIGVIVNNVEK  |            | 189-237   | Q9KCR8   | <i>B. halodurans</i>          |          |     |
| CatSper1          | TLDDWSLVIYDNRAGG                                                       |        | AWYIIPILMIYIVIQYFIFLNLVIAVLDNFMQ   |            | 534-579   | Q91ZR5   | Mouse                         |          |     |
| TPC1              | TTANFPDVMMPYSR                                                         |        | NPWSCVFFIYVLSIELYFIMNLLAVVDFTFND   |            | 278-325   |          | Human                         |          |     |
|                   | VNNWYIIMEGVTSQ                                                         |        | TSHWRLYFMTFYIVTMVMTIIVAFILFAFV     |            | 645-692   | Q9ULQ1   |                               |          |     |
| TPC2              | TTANNPDVMPAYSK                                                         |        | NRAYAIFFIVFTVIGSLFMLNLLTAIISQFRG   |            | 270-317   | Q8NHX9   | Human                         |          |     |
|                   | VNNWQVFLDAYRRYS                                                        |        | GPWSKIYFVWLWLVSSVIWVNLFLALILENFLH  |            | 651-699   |          |                               |          |     |
| Cav1.2            | TMEGWTDLVYVNDVAVG                                                      |        | RDWPWYFVFLIIGSFFVNLNLVGLVSGEFSK    |            | 361-410   |          |                               |          |     |
|                   | TGEDWNSVMYDGMAYGGPSFP                                                  |        | GMLVCIYFIIILFCGNYIILNVFLAIAVDNLAD  |            | 704-758   | Q13936   | Human                         |          |     |
|                   | TFEGWPELLYRSIDSHTEKDGPIYNY                                             |        | RVEISIFFIYIIIIAIFMMNIFVGFVIVTFQE   |            | 1133-1191 |          |                               |          |     |
|                   | TGEAWQDMLACMPKCAPSEPSNSTEGETPCG                                        |        | SSFVAVFYFISFYMLCAFLIINLNVAVIMDNFDY |            | 1462-1529 |          |                               |          |     |
|                   | TMEGWTDLVYVNDVAVG                                                      |        | NTWNWLYFIPILIIIGSFFMLNLLVGLVSGEFAK |            | 316-365   |          |                               |          |     |
|                   | TGEDWNEVMYDGIKSGGGVQG                                                  |        | GMVFSIYFIVLTLFGNYIILNVFLAIAVDNLAN  |            | 666-719   |          |                               |          |     |
| Cav2.1            | TGEGWPKVLKHSVDATFENQGPSPGY                                             |        | RMEMSIFVYVYFVFFVFNLFVAVIMDNFDY     |            | 1458-1516 | Q00555   | Human                         |          |     |
|                   | TGEAWHNIIMLSCLSGKPCDKNSGILTRCG                                         |        | NEFAYFYFVSFIFLCSFLMLNLFVAVIMDNFEY  |            | 1754-1816 |          |                               |          |     |
|                   | TLEGWVDIMYFVMDAH                                                       |        | SFYNYFIFILLIVGSSFFMNLCLVVIATQFSE   |            | 352-400   |          |                               |          |     |
|                   | TQEDWNLKLVYNGMAST                                                      |        | SSWAALYFIAMLTFGNYVLENLVAVILVEGFQA  |            | 921-969   |          |                               |          |     |
| Cav3.1            | SKDGVWDIMYDGLDAVGVDQQPIMNH                                             |        | NPWMLLYFISFLVIAVFFVNLNMFVGVVVENFHK |            | 1484-1539 | Q43497   | Human                         |          |     |
|                   | TGDNNWNGIMKDTLRCDQESTCYN                                               |        | TVSPTIYFVSVFLTAQFVLLNVVIVAVLMLKLEE |            | 1800-1856 |          |                               |          |     |
| TRPV1 (capsaicin) | IGMGDELFTEYDF                                                          |        | KAVFIILLAYVITLILLNMLIAMLGTEVTK     |            | 643-689   | Q8NER1   | Human                         |          |     |
| TRPV3 (warmth)    | IGLGLDNIQQNSKY                                                         |        | PILFLFLITVYVILTFVLLNMLIAMLGTEVEN   |            | 637-683   | Q8NET8   | Human                         |          |     |
| TRPV5             | LIVIDAPANVDVLD                                                         |        | PFMFSIVNFAPALIAITLMLNLFIAMMGDTHWR  |            | 538-584   | Q9NQA5   | Human                         |          |     |
| TRPA1             | MMGLDINRESFLEPPLRNELAH                                                 |        | PVLSFAQVLSFTIFVPIVLMNLLIGLAVGDIAE  |            | 911-966   | Q57562   | Human                         |          |     |
| TRPC1             | HSFIGTCFALFWYIF                                                        |        | SFVGVAVIGVYVNVVVVILTKLLVAMLHKSFQL  |            | 585-651   | P48995   | Human                         |          |     |
| TRPC5             | STLFEITLQSLFWSVFGLLNLYV                                                |        | TNVKARHEFT                         |            | 566-630   | Q9UL62   | Human                         |          |     |
| TRPM2             | PGYIDGVNFBPHCSPNGDDPYKPKCPESDATTQQRPAFPEWLT                            |        | TVLLLCYLLFTNILLNLLIAMFNFTFQQ       |            | 983-1054  | Q94759   | Human                         |          |     |
| TRPM8 (menthol)   | PSDVDGTTYDFACHTFTGNES-KPLCVELD-EHNLRFPEWTTIPLVCIYMLSTNILLVNLVAMFGYIVGT |        |                                    |            | 916-985   | Q7Z2W7   | Human                         |          |     |
